# Supplementary material for: In vivo switch to IL-10–secreting T regulatory cells in high dose allergen exposure
Source: PubMed Central journal article supplement — J Exp Med. 2008 Nov 24;205(12):2887–98. doi: 10.1084/jem.20080193 (PMC2585856; doi:10.1084/jem.20080193), 2008-11-24
Supplement: jem.20080193_1.pdf [file jem.20080193_1.pdf]

## SUPPLEMENTAL MATERIAL

Meiler et al., <http://www.jem.org/cgi/content/full/jem.20080193/DC1>

## SUPPLEMENTAL MATERIALS AND METHODS

## Frequency calculation of purified allergen-specific T cells.

The minimum number of cells to start antigen-specific cytokine-secreting CD4<sup>+</sup> T cell purification is  $5 \times 10^7$  cells.  $2.5 \times 10^7$  cells were stimulated with 0.3  $\mu$ M of antigen in 5 ml of medium in 6-well plates in duplicates for 12 h. The frequency of allergen-stimulated and unstimulated cells was calculated by dividing the number of purified cytokine-secreting CD4<sup>+</sup> T cells by the initial number of CD4<sup>+</sup> T cells. Cells were counted by using a 9-mm<sup>2</sup> area of a Neubauer counting chamber and Trypan blue exclusion.

The number of CD4<sup>+</sup> cells was calculated as follows in an example of PLA-specific IL-10-secreting CD4<sup>+</sup> T cells: PLA-stimulated cells,  $47.4 \times 10^6$  (cell count from culture after 12 h)  $\times$  52.8% (percentage of CD4<sup>+</sup> T cells determined by flow cytometry) =  $25.02 \times 10^6$  CD4<sup>+</sup> T cells at the start; unstimulated cells,  $47.10^6$  (cell count from culture after 12 h)  $\times$  53.1% (percentage of CD4<sup>+</sup> T cells) =  $25.01 \times 10^6$  CD4<sup>+</sup> T cells at the start.

Purified cells were counted and the number of CD4<sup>+</sup> IL-10-secreting T cells was calculated as follows: PLA-stimulated cells, 33,000 (cell count after purification)  $\times$  92.4% (percentage of purified CD4<sup>+</sup> IL-10<sup>+</sup> T cells) = 30,492 purified CD4<sup>+</sup> PLA-specific, IL-10-secreting T cells; unstimulated cells, 11,000 (cell count after purification)  $\times$  88.4% (percentage of purified CD4<sup>+</sup> IL-10<sup>+</sup> T cells) = 9,724 CD4<sup>+</sup> and IL-10-secreting T cells without any stimulation.

The CD4<sup>+</sup> IL-10-secreting T cell frequency was calculated by dividing the purified CD4<sup>+</sup> IL-10-secreting T cell number by CD4<sup>+</sup> T cell number at the start of cytokine secretion assay: PLA-stimulated cells, 30,492 divided by  $25.02 \times 10^6 = 0.001218$  (12.12 cells in 10,000); unstimulated cells, 9,742 divided by  $25.01 \times 10^6 = 0.000389$  (3.89 cells in 10,000).

The final frequency of PLA-specific IL-10-secreting T cells was calculated by subtracting the unstimulated CD4<sup>+</sup> IL-10-secreting cell frequency from the PLA-specific CD4<sup>+</sup> IL-10-secreting cell frequency ( $0.001218 - 0.000389 = 0.000829$ ). That means that 8.29 cells in 10,000 CD4<sup>+</sup> cells are PLA-specific, IL-10-secreting, Tr1-like cells.

## Specific T cell suppression by IL-10-secreting T cells.

PLA-, Bet v 1-, and Der p 1-specific IL-4-, IL-10-, and IFN- $\gamma$ -secreting T cells were purified from the same beekeeper. As an example of one experiment,  $2 \times 10^5$  PBMCs were used per well in 96-well flat-bottom plates in triplicates. These cells consisted of 48% CD4<sup>+</sup> T cells (determined by flow cytometry). The frequency of PLA-specific, IL-4-secreting T cells was calculated and found to be 1.1 cells per 10,000 CD4<sup>+</sup> cells. This means that there were  $2 \times 10^5 \times 0.48 = 9.6 \times 10^4$  CD4<sup>+</sup> T cells and  $1.1 \times 9.6 = 10.6$  PLA-specific IL-4-secreting CD4<sup>+</sup> T cells in PBMCs at the starting point. The PBMCs of a beekeeper obtained after multiple bee stings did not show any proliferation. In the next condition, the frequency of the PLA-specific IL-4-secreting CD4<sup>+</sup> T cells was increased by 10 times to 96 cells per well, and a visible allergen-stimulated T cell proliferation was determined by [<sup>3</sup>H] thymidine incorporation. In the same experimental conditions, the frequency of IL-10-secreting T cells was detected as 11.6 cells per 10,000 CD4<sup>+</sup> T cells. When this was increased from 11.6 to 116 cells per 10,000 CD4<sup>+</sup> T cells, PLA-induced T cell proliferation was significantly suppressed. This means that the number of IL-10-secreting T cells was increased from 113 cells per well to  $11.6 \times 9.6 = 1,130$  cells per well. In summary, PLA-induced T cell proliferation, which was abolished after bee stings, was reconstituted by increasing the numbers of PLA-specific IFN- $\gamma$ - or IL-4- but not IL-10-secreting T cells. PLA-specific IL-10-secreting T cells suppressed PLA-stimulated and proliferating IL-4- and IFN- $\gamma$ -secreting-specific T cells. For comparison, Bet v 1- and Der p 1-specific IL-10-secreting T cells did not suppress PLA-stimulated T cell proliferation, demonstrating the specificity of the T cell suppression by PLA-specific IL-10-secreting T cells.

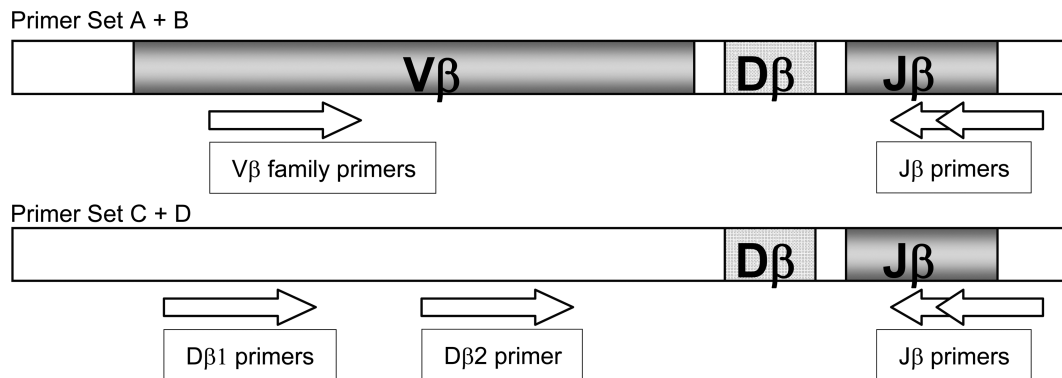

| Primer Set | Target      | Primers used in the primer sets                 | Product Size in Basepairs |
|------------|-------------|-------------------------------------------------|---------------------------|
| A          | Vβ + Jβ1/2  | 23 Vβ primers + 6 Jβ1 primers and 3 Jβ2 primers | 240-285                   |
| B          | Vβ + Jβ2    | 23 Vβ primers + 4 Jβ2 primers                   | 240-285                   |
| C*         | Dβ1 + Jβ1/2 | 1 Dβ primer + 13 Jβ primers                     | 285-325                   |
| D*         | Dβ2 + Jβ1/2 | 1 Dβ primer + 13 Jβ primers                     | 170-210                   |

\* Primer set C and D are amplified in the same tube.

**Figure S1. Details of TCR clonality analysis.** Simplified diagram of a representative rearranged TCRβ gene on chromosome 7 (7q35) showing the approximate placement of primers used in the *TCRB* gene clonality assay. Multiple consensus DNA primers that target conserved genetic regions within the TCRβ gene were used in three different assay tubes. The first assay tube contains primer set A with different Vβ and joining region (J) β1/2 primers, primer set B in the second assay tube consists of Vβ and Jβ2 primers, and the third assay tube contains primer set C with the diversity (D) β1 and Jβ1/2 primers and primer set D with Dβ2 and Jβ1/2 primers. The conserved regions lie on either side of an area within the V-J region, where programmed genetic rearrangements occur during maturation of all T lymphocytes (*InVivoScribe Technologies, Inc.*).

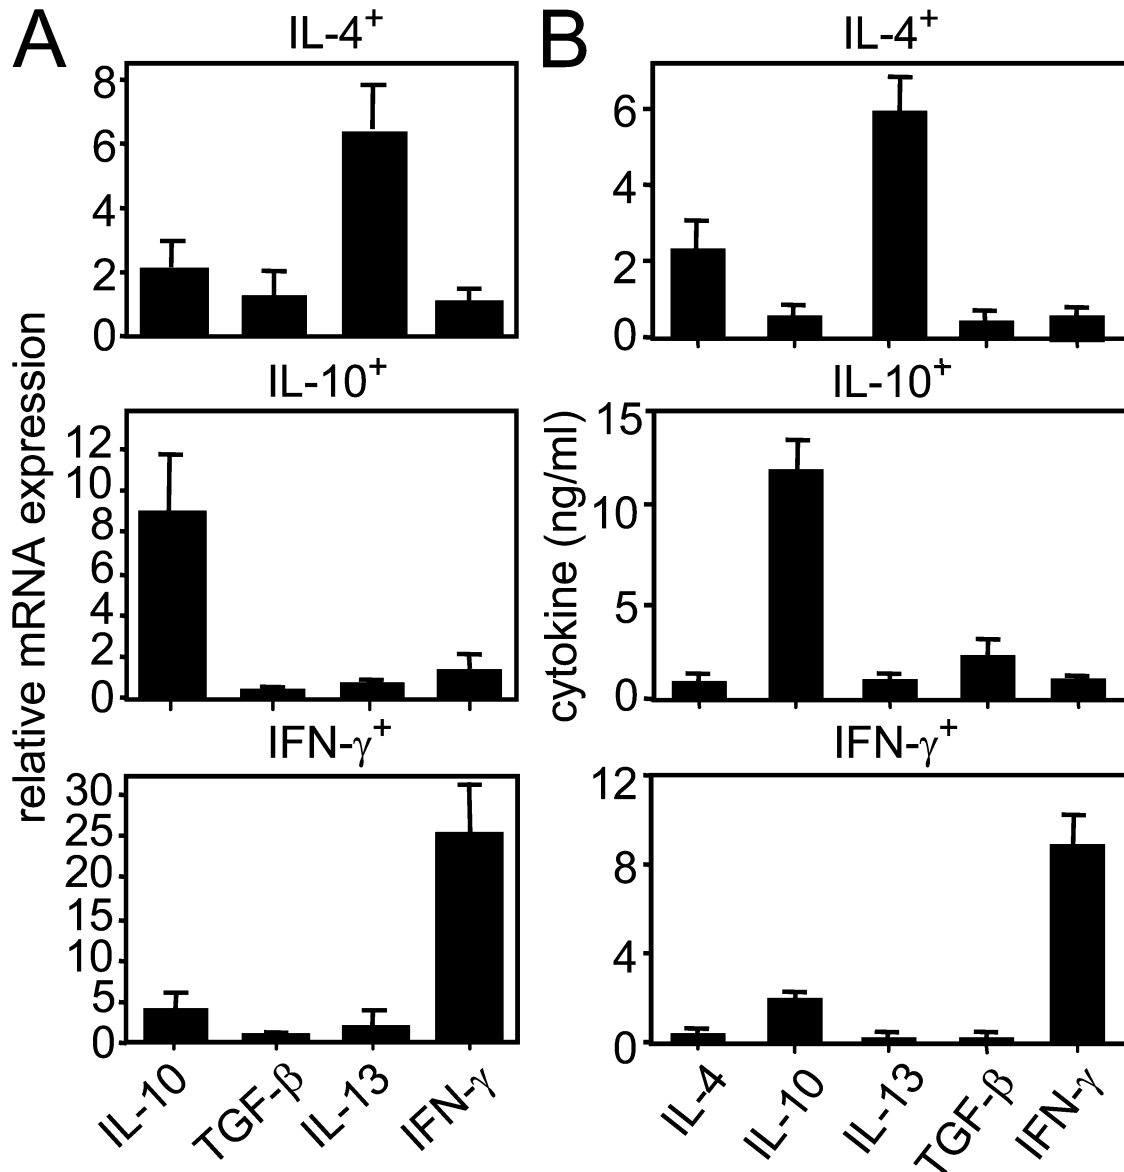

Figure S2. PLA-specific IL-4<sup>+</sup>, IFN-γ<sup>+</sup>, and IL-10<sup>+</sup>-secreting T cells represent Th2<sup>-</sup>, Th1<sup>-</sup>, and Tr1-like cells, respectively. CD4<sup>+</sup> T cells specific to bee venom PLA were isolated according to their IL-4, IFN-γ, and IL-10 secretion profiles. To confirm their cytokine profile, mRNA of IL-10, IL-13, IFN-γ, and TGF-β were quantified immediately after isolation (A). Relative to the housekeeping gene EF-1α, IL-10-secreting T cells expressed significantly high IL-10 mRNA, and IFN-γ-secreting T cells expressed significantly high IFN-γ mRNA. IL-13 mRNA was dominant in IL-4-secreting T cells. The same results were obtained in three independent experiments. Purified allergen-specific cytokine-secreting T cells were expanded for 12 d in the presence of 1-nM doses of growth factors (IL-2 for IFN-γ-secreting T cells, IL-2 and IL-4 for IL-4-secreting T cells, and IL-2 and IL-15 for IL-10-secreting T cells; Novartis). Quantification of the cytokine profile in supernatants by ELISA 72 h after anti-CD2, anti-CD3, and anti-CD28 mAb stimulation demonstrated that these subsets contain Th2-like (IL-4 and IL-13 high), Th1-like (IFN-γ high), and Tr1-like (IL-10 high) cells, respectively (all  $P < 0.0001$  compared with other subsets; B). In addition, all three purified subsets consisted of some Th0 cells, which secrete both Th1 and Th2 cytokines, as well as IL-10 and TGF-β. Data are expressed as means + SEM.

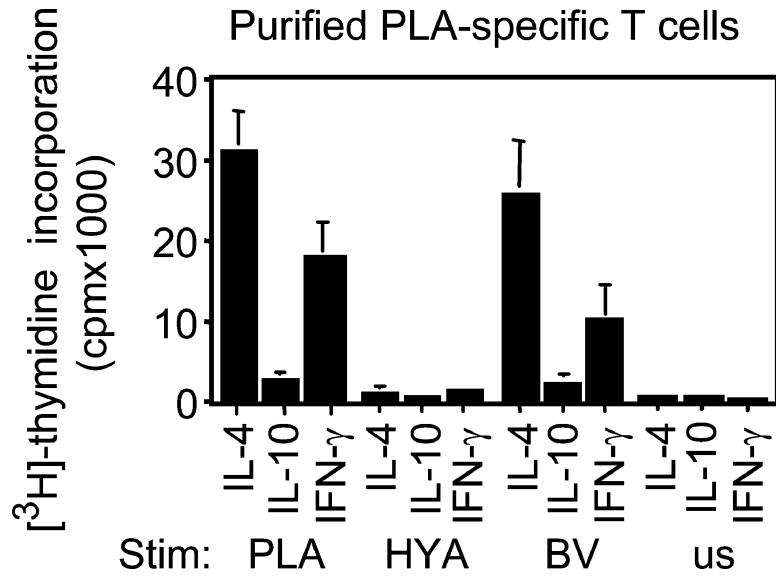

**Figure S3. Antigen specificity of purified cytokine-secreting T cells.** The antigen specificity of purified cytokine-secreting T cells was determined by stimulation with the allergen that was originally used for stimulation before purification and several control antigens in the presence of autologous APCs. Purified allergen-specific cytokine-secreting T cells were expanded for 12 d in the presence of 1-nM doses of growth factors (IL-2 for IFN- $\gamma$ -secreting T cells, IL-2 and IL-4 for IL-4-secreting T cells, and IL-2 and IL-15 for IL-10-secreting T cells). T cells purified by certain antigen stimulation did not show any cross-reactivity against control antigens. All three subsets purified by PLA stimulation responded to PLA and whole bee venom but not to hyaluronidase as another bee venom major allergen. [<sup>3</sup>H]Thymidine incorporation was determined after 5 d. \*,  $P < 0.001$ . One representative of three different donors is shown. Data are expressed as means + SEM.

**Table S1.** Changes in TCR  $\nu\beta$  expression on PLA-specific IL-10-, IFN- $\gamma$ -, and IL-4-secreting CD4+ T cells before and after bee stings

| Beekeeper A<br>Expanded with PLA          |      |       |       |      |      |      |      |       |      |       |       |       |      |      |      |       |      |      |      |       |      |
|-------------------------------------------|------|-------|-------|------|------|------|------|-------|------|-------|-------|-------|------|------|------|-------|------|------|------|-------|------|
| before                                    |      |       |       |      |      |      |      |       |      |       |       |       |      |      |      |       |      |      |      |       |      |
| TCR $\nu\beta$                            | 1    | 2     | 3     | 5.1  | 5.2  | 5.3  | 7    | 8     | 9    | 11    | 12    | 13.1  | 13.6 | 14   | 16   | 17    | 18   | 20   | 21.3 | 22    | 23   |
| IL-4-secreting cells                      | 1.05 | 25.80 | 0.78  | 3.10 | 0.16 | 0.44 | 1.50 | 25.30 | 1.42 | 0.65  | 1.85  | 2.52  | 0.49 | 0.81 | 0.95 | 3.14  | 0.37 | 1.95 | 0.89 | 3.00  | 3.64 |
| IL-10-secreting cells                     | 3.55 | 3.50  | 0.18  | 1.04 | 0.15 | 1.19 | 0.18 | 1.93  | 1.40 | 0.95  | 0.49  | 5.86  | 0.36 | 0.67 | 0.00 | 1.22  | 0.38 | 2.74 | 0.34 | 0.17  | 1.18 |
| after                                     |      |       |       |      |      |      |      |       |      |       |       |       |      |      |      |       |      |      |      |       |      |
| TCR $\nu\beta$                            | 1    | 2     | 3     | 5.1  | 5.2  | 5.3  | 7    | 8     | 9    | 11    | 12    | 13.1  | 13.6 | 14   | 16   | 17    | 18   | 20   | 21.3 | 22    | 23   |
| IL-4-secreting cells                      | 2.00 | 6.47  | 2.72  | 7.71 | 0.19 | 0.31 | 4.09 | 4.28  | 7.41 | 0.56  | 4.44  | 3.95  | 1.31 | 2.48 | 1.20 | 2.99  | 0.71 | 2.41 | 1.11 | 3.99  | 0.59 |
| IL-10-secreting cells                     | 6.05 | 19.50 | 1.81  | 4.50 | 0.22 | 0.32 | 0.28 | 4.99  | 0.26 | 0.28  | 3.18  | 0.93  | 4.21 | 4.39 | 0.45 | 0.24  | 0.16 | 1.14 | 1.50 | 8.97  | 0.53 |
| Beekeeper A<br>Expanded with anti-CD3 mAb |      |       |       |      |      |      |      |       |      |       |       |       |      |      |      |       |      |      |      |       |      |
| before                                    |      |       |       |      |      |      |      |       |      |       |       |       |      |      |      |       |      |      |      |       |      |
| TCR $\nu\beta$                            | 1    | 2     | 3     | 5.1  | 5.2  | 5.3  | 7    | 8     | 9    | 11    | 12    | 13.1  | 13.6 | 14   | 16   | 17    | 18   | 20   | 21.3 | 22    | 23   |
| IL-4-secreting cells                      | 2.80 | 10.80 | 3.03  | 4.23 | 0.57 | 0.97 | 1.83 | 13.80 | 2.46 | 0.94  | 3.86  | 4.40  | 0.89 | 0.89 | 1.99 | 5.89  | 1.69 | 1.69 | 2.43 | 3.34  | 0.77 |
| IL-10-secreting cells                     | 3.14 | 6.84  | 0.12  | 3.60 | 1.21 | 0.51 | 0.74 | 9.15  | 2.59 | 0.62  | 0.56  | 9.20  | 1.59 | 3.51 | 0.17 | 7.30  | 0.00 | 6.17 | 1.11 | 3.99  | 0.69 |
| IFN- $\gamma$ -secreting cells            | 0.60 | 3.73  | 0.07  | 5.39 | 0.04 | 2.16 | 0.00 | 0.34  | 1.52 | 0.04  | 9.05  | 13.60 | 0.22 | 4.95 | 0.30 | 11.60 | 5.71 | 1.74 | 0.44 | 0.99  | 0.37 |
| after                                     |      |       |       |      |      |      |      |       |      |       |       |       |      |      |      |       |      |      |      |       |      |
| TCR $\nu\beta$                            | 1    | 2     | 3     | 5.1  | 5.2  | 5.3  | 7    | 8     | 9    | 11    | 12    | 13.1  | 13.6 | 14   | 16   | 17    | 18   | 20   | 21.3 | 22    | 23   |
| IL-4-secreting cells                      | 3.46 | 6.06  | 1.06  | 8.46 | 0.23 | 0.80 | 6.06 | 4.03  | 1.63 | 0.31  | 1.80  | 4.46  | 2.37 | 2.70 | 0.40 | 4.09  | 1.31 | 1.71 | 3.09 | 4.89  | 0.89 |
| IL-10-secreting cells                     | 8.03 | 10.30 | 0.83  | 2.66 | 0.09 | 0.09 | 0.29 | 4.77  | 0.40 | 0.60  | 11.90 | 2.26  | 7.97 | 1.43 | 1.71 | 0.63  | 0.26 | 2.71 | 0.60 | 6.86  | 0.14 |
| IFN- $\gamma$ -secreting cells            | 0.49 | 7.03  | 0.51  | 4.69 | 1.14 | 0.29 | 1.34 | 2.74  | 0.49 | 1.34  | 0.54  | 4.66  | 0.49 | 0.94 | 0.20 | 1.17  | 0.80 | 1.06 | 5.20 | 13.90 | 0.40 |
| Beekeeper B<br>Expanded with PLA          |      |       |       |      |      |      |      |       |      |       |       |       |      |      |      |       |      |      |      |       |      |
| before                                    |      |       |       |      |      |      |      |       |      |       |       |       |      |      |      |       |      |      |      |       |      |
| TCR $\nu\beta$                            | 1    | 2     | 3     | 5.1  | 5.2  | 5.3  | 7    | 8     | 9    | 11    | 12    | 13.1  | 13.6 | 14   | 16   | 17    | 18   | 20   | 21.3 | 22    | 23   |
| IL-4-secreting cells                      | 1.69 | 5.80  | 7.74  | 4.74 | 0.37 | 0.26 | 5.11 | 1.77  | 2.06 | 0.03  | 5.60  | 2.11  | 1.29 | 1.60 | 0.57 | 13.10 | 0.03 | 7.03 | 1.51 | 4.80  | 0.77 |
| IL-10-secreting cells                     | 0.18 | 22.90 | 19.80 | 4.31 | 0.06 | 0.47 | 0.95 | 2.11  | 3.43 | 0.00  | 0.72  | 6.35  | 0.00 | 0.72 | 0.18 | 2.06  | 0.06 | 0.60 | 3.14 | 0.54  | 0.24 |
| IFN- $\gamma$ -secreting cells            | 2.53 | 6.13  | 4.74  | 3.53 | 0.04 | 0.39 | 1.24 | 11.60 | 1.00 | 12.00 | 2.26  | 2.21  | 1.06 | 3.01 | 0.55 | 9.37  | 0.84 | 1.25 | 0.48 | 1.27  | 1.25 |
| after                                     |      |       |       |      |      |      |      |       |      |       |       |       |      |      |      |       |      |      |      |       |      |
| TCR $\nu\beta$                            | 1    | 2     | 3     | 5.1  | 5.2  | 5.3  | 7    | 8     | 9    | 11    | 12    | 13.1  | 13.6 | 14   | 16   | 17    | 18   | 20   | 21.3 | 22    | 23   |
| IL-4-secreting cells                      | 4.09 | 9.63  | 3.20  | 9.03 | 0.40 | 0.29 | 0.31 | 6.40  | 2.11 | 0.03  | 1.69  | 3.97  | 0.51 | 4.43 | 0.57 | 3.40  | 0.97 | 0.74 | 2.46 | 3.06  | 0.77 |
| IL-10-secreting cells                     | 6.47 | 4.57  | 1.56  | 3.29 | 0.32 | 0.61 | 0.29 | 33.50 | 2.69 | 0.17  | 1.18  | 1.42  | 2.05 | 0.09 | 2.65 | 1.42  | 0.41 | 6.22 | 1.10 | 0.78  | 0.69 |
| IFN- $\gamma$ -secreting cells            | 0.16 | 8.86  | 3.38  | 1.18 | 0.12 | 0.26 | 0.26 | 0.44  | 0.16 | 0.00  | 0.06  | 1.10  | 4.32 | 0.02 | 0.16 | 0.44  | 0.16 | 0.18 | 0.38 | 2.80  | 0.12 |
| healthy controls (n=4)                    |      |       |       |      |      |      |      |       |      |       |       |       |      |      |      |       |      |      |      |       |      |
| TCR $\nu\beta$                            | 1    | 2     | 3     | 5.1  | 5.2  | 5.3  | 7    | 8     | 9    | 11    | 12    | 13.1  | 13.6 | 14   | 16   | 17    | 18   | 20   | 21.3 | 22    | 23   |
| mean                                      | 3.11 | 8.85  | 1.78  | 4.71 | 0.63 | 0.84 | 1.63 | 4.94  | 2.48 | 0.58  | 1.83  | 4.09  | 2.21 | 2.06 | 0.67 | 5.4   | 0.78 | 1.7  | 2.1  | 4.63  | 0.33 |
| Std. Dev.                                 | 0.42 | 1.15  | 0.89  | 1.34 | 0.14 | 0.08 | 0.46 | 0.58  | 1.54 | 0.09  | 0.51  | 0.33  | 0.19 | 0.32 | 0.23 | 0.96  | 0.11 | 1.18 | 0.17 | 3.03  | 0.03 |

PLA-specific IL-10-, IFN- $\gamma$ -, and IL-4-secreting T-cells were purified from two beekeepers before and after multiple bee stings and were stimulated either with PLA (beekeepers A and B) or anti-CD3 mAbs (beekeeper A) in the presence of 3,000 rads of irradiated autologous PBMCs and were expanded with IL-2 for 12 d. Anti-CD3 stimulation was used for beekeeper A, because IFN- $\gamma$ -secreting T cells did not expand with PLA stimulation. PBMCs of four healthy donors were used for controls. The cells were stained with PE-labeled anti-TCR $\nu\beta$ 1, 2, 3, 5.1, 5.2, 5.3, 7, 8, 9, 11, 12, 13.1, 13.6, 14, 16, 17, 18, 20, 21.3, 22, and 23 mAbs; anti-CD3-FITC; and anti-CD4-Pc5 or matching isotype control and analyzed by flow cytometry.

**Table S2.** Changes in frequency of PLA-specific cytokine-secreting T cells (in 10,000 CD4+ T cells) after bee stings

|             | IFN- $\gamma$<br>before | IFN- $\gamma$<br>after | IL-4<br>before | IL-4<br>after | IL-10<br>before | IL-10<br>after |
|-------------|-------------------------|------------------------|----------------|---------------|-----------------|----------------|
| Beekeeper A | 5.4                     | 2.3                    | 2.1            | 0.9           | 4.9             | 14.1           |
| Beekeeper B | 4.7                     | 2.2                    | 1.8            | 0.7           | 6.2             | 12.8           |

These frequencies were used to calculate the frequency of TCRV $\beta$ -expressing cells in CD4+ T cells demonstrated in Fig. 4 B.
